# Supplementary material
Source: PubMed Central journal article supplement (PMC6754515)
Supplement: NIHMS1024456-supplement-13.pdf [file NIHMS1024456-supplement-13.pdf]

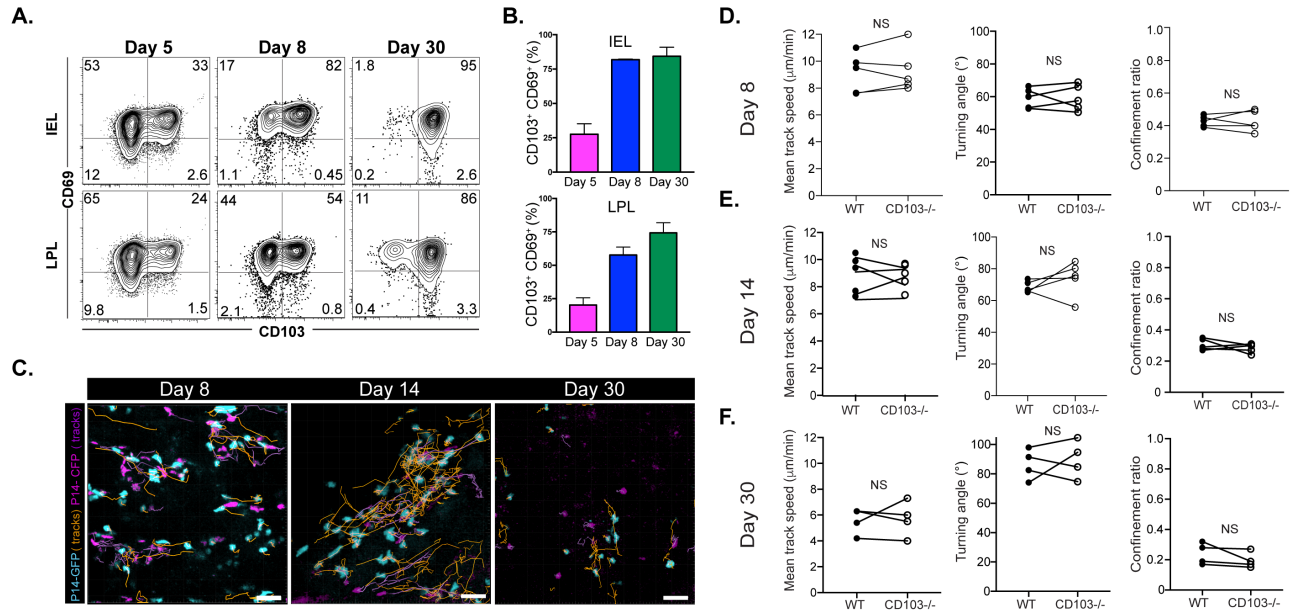

**Figure S3. Motility of CD8 T cells in the SI is independent of CD103 integrin, related to Figure 2. (A)**

Phenotypic analysis of wildtype P14 CD8 IEL (top) and LPL (bottom) at day 5, 8 and 30 after LCMV infection using flow cytometry. Plots are gated on P14 CD8 T cells. **(B)** Frequency of CD103<sup>+</sup>/CD69<sup>+</sup> P14 IEL (top) and LPL (bottom) as in (A) at day 5 (magenta), day 8 (blue) and day 30 (green) after LCMV infection. Error bars are SEM.

**(C)** Naïve wildtype P14-GFP and P14/CD103<sup>-/-</sup>-CFP CD8 T cells were co-transferred to B6 mice that were infected with LCMV one day later. Cell tracks (P14-GFP=orange; P14/CD103<sup>-/-</sup>-CFP=purple) of TPLSM of P14-GFP CD8 T cells (cyan) and P14/CD103<sup>-/-</sup>-CFP CD8 T cells (magenta) in the villi at the indicated time points after infection. Scale bars are 20 μm. **(D-F)** Average mean track speed, median turning angle and confinement ratio per mouse for WT (closed circles) and CD103<sup>-/-</sup> (open circles) P14 CD8 T cells at **(D)** day 8, **(E)** day 14 and day 30 **(F)** after LCMV infection. A Mann-Whitney test was used to evaluate statistical significance, n=4 mice.
